# Supplementary material for: In situ growth and assembly of microporous aluminophosphate nanosheets into ordered architectures at low temperature and their enhanced catalytic performance
Source: Royal Society of Chemistry journal article supplement (doi:10.1039/c5ta00888c), 2015-01-01
Supplement: c5ta00888c1.pdf [file c5ta00888c1.pdf]

Supporting information

## **In Situ Growth and Assembly of Microporous Aluminophosphate Nanosheets into Ordered Architectures at Low Temperature and the Enhanced Catalytic Performance**

Beibei Gao,<sup>ab</sup> Peng Tian,<sup>a</sup> Mingrun Li,<sup>c</sup> Miao Yang,<sup>a</sup> Yuyan Qiao,<sup>ab</sup> Linying Wang,<sup>a</sup> Shutao Xu,<sup>a</sup>  
and Zhongmin Liu<sup>\*ac</sup>

<sup>a</sup> National Engineering Laboratory for Methanol to Olefins, Dalian National Laboratory for Clean Energy, Dalian Institute of Chemical Physics, Chinese Academy of Sciences, Dalian 116023, P. R. China. E-mail: liuzm@dicp.ac.cn

<sup>b</sup> University of Chinese Academy of Sciences, Beijing 100049, P. R. China

<sup>c</sup> State Key Laboratory of Catalysis, Dalian Institute of Chemical Physics, Chinese Academy of Sciences, Dalian 116023, P. R. China.

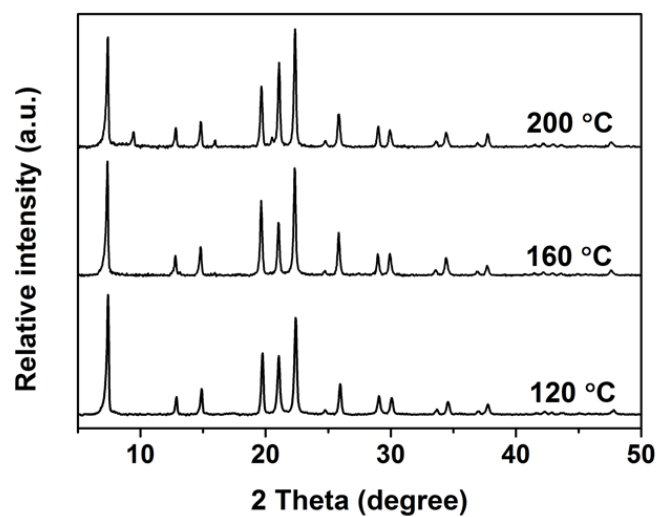

**Fig. S1** XRD patterns of the products prepared at different crystallization temperatures. The synthetic gel compositions are 1.5 TEA: 0.8 Al<sub>2</sub>O<sub>3</sub>: 1.0 P<sub>2</sub>O<sub>5</sub>: 0.5 SiO<sub>2</sub>: 50 H<sub>2</sub>O. The crystallization time is 24h.

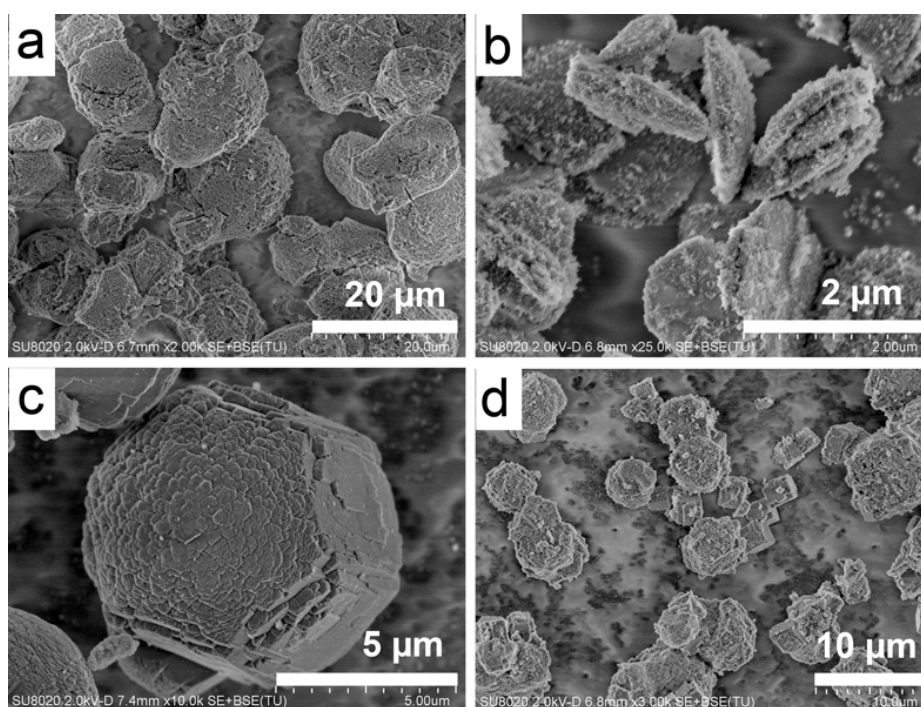

**Fig. S2** SEM images of the samples prepared with different templates at 200 °C: (a) dimethylethanolamine; (b) ; (c) TPA; (d) TEAOH.

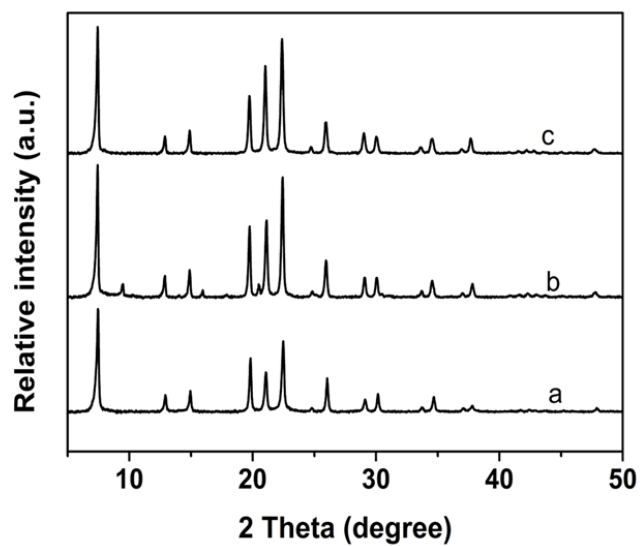

**Fig. S3** XRD patterns of the MeAPO-5-NS products: (a) CrAPO-5-NS; (b) CoAPO-5-NS; (c) MnAPO-5-NS.

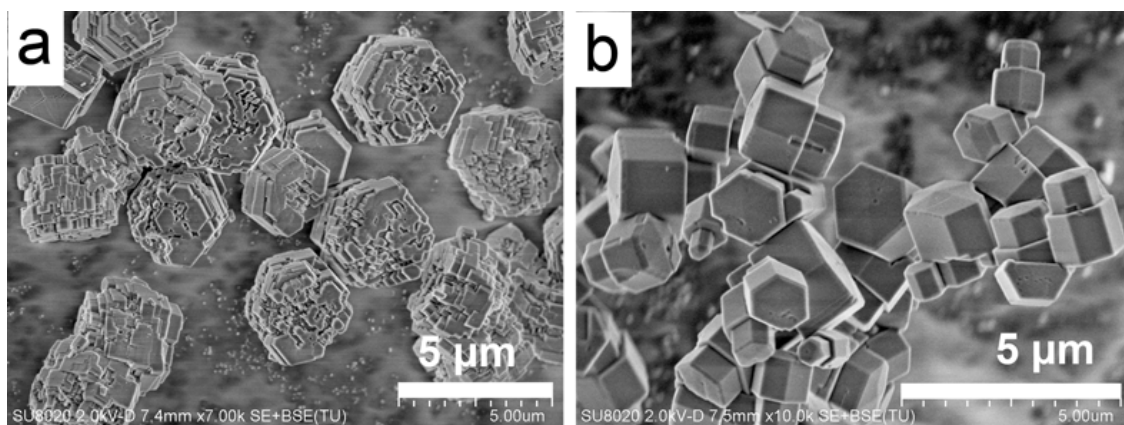

**Fig. S4** SEM images of the conventional SAPO-5-C (a) and MnAPO-5-C (b).

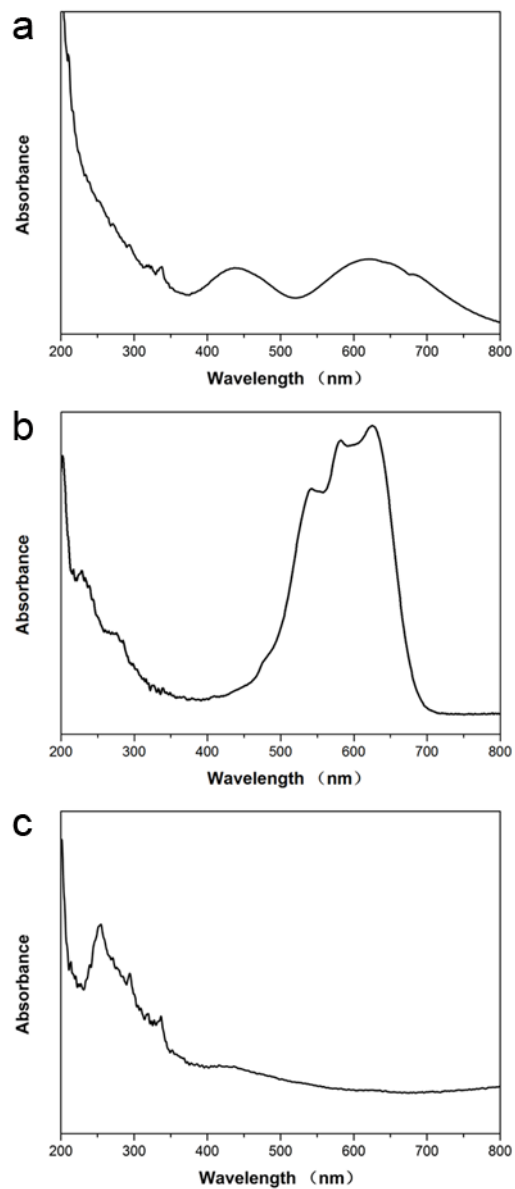

**Fig. S5** DR UV - Vis spectra of the as-synthesized MeAPO-5-NS: (a) CrAPO-5-NS, (b) CoAPO-5-NS, (c) MnAPO-5-NS.

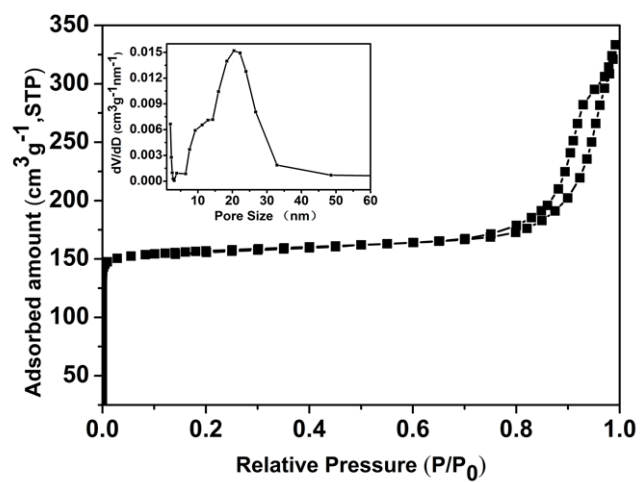

**Fig. S6** N<sub>2</sub> adsorption-desorption isotherms of DNL-7-Co. The inset shows the corresponding BJH pore size distribution curve calculated from the desorption branch.

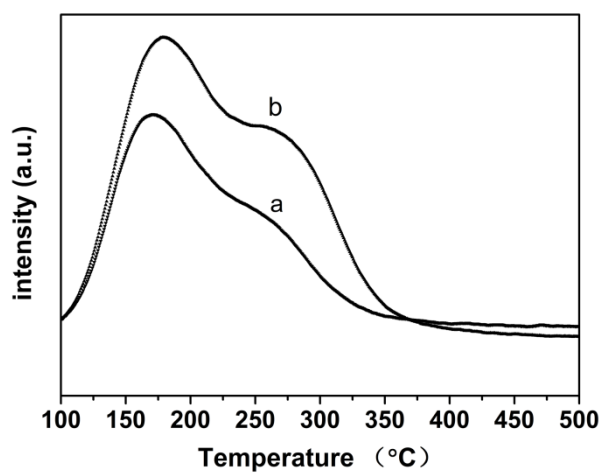

**Fig. S7** NH<sub>3</sub>-TPD profiles of SAPO-5-NS2 (a) and SAPO-5-C (b).
